# Supplementary material
Source: PubMed Central journal article supplement (PMC5100754)
Supplement: supp_pp.16.00780_PP2016-00780DR1_Supplemental_Figure_S3.pdf [file supp_pp.16.00780_PP2016-00780DR1_Supplemental_Figure_S3.pdf]

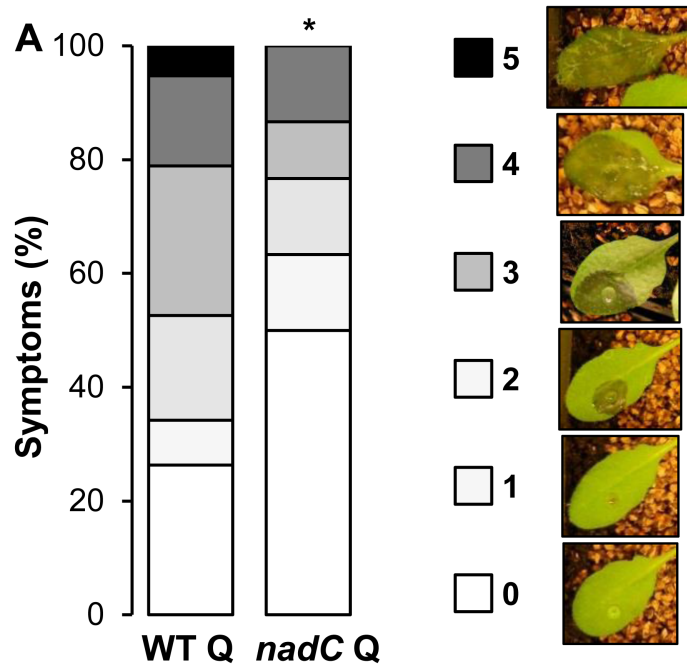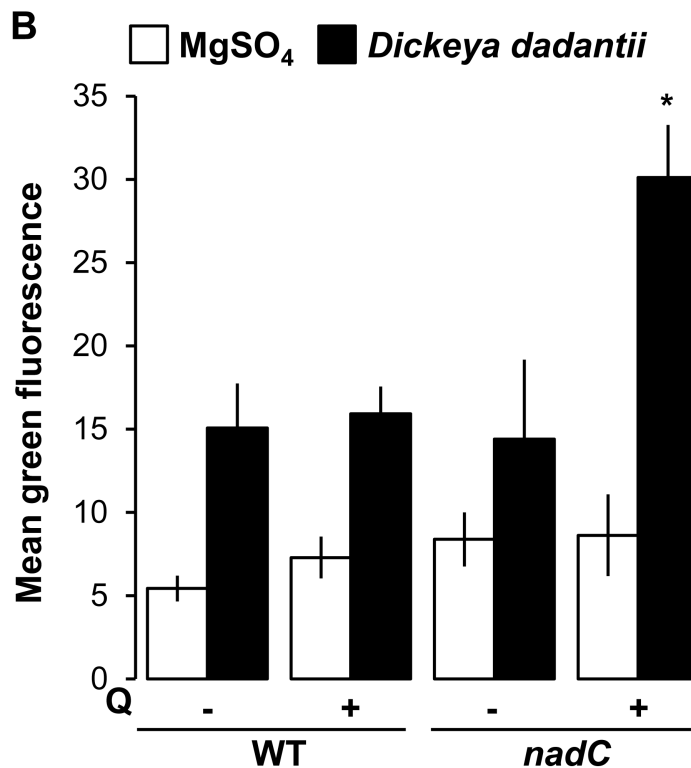

**Supplemental Fig. S3. The resistance phenotype of *Dickeya dadantii* correlates with augmented ROS contents** **A**, symptoms severity of quinolinate (Q)-treated wild-type Col-0 (WT Q) and *nadC* plants (*nadC* Q) 48 hours after infection with *Dickeya dadantii* ( $n = 12$ ). Photographs on the right illustrate symptoms scoring (courtesy of Dominique Expert). Asterisks indicate statistically significant differences between classes ( $P < 0.05$ , Fisher's exact test). **B**, detection of intracellular ROS by DCFH-DA fluorescence after infection with *Dickeya dadantii* in the half of each leaf (20 hpi). Charts represent means of 12 leaves  $\pm$  SEM ( $n = 12$ ) for mock-inoculated leaves (white bars) and *Dickeya dadantii*-inoculated leaves (black bars). Asterisks indicate statistically significant differences between Q-treated WT and *nadC* ( $P < 0.05$ ,  $t$ -test).
