# Supplementary material
Source: PubMed Central journal article supplement (PMC5100754)
Supplement: supp_pp.16.00780_PP2016-00780DR1_Supplemental_Figure_S4.pdf [file supp_pp.16.00780_PP2016-00780DR1_Supplemental_Figure_S4.pdf]

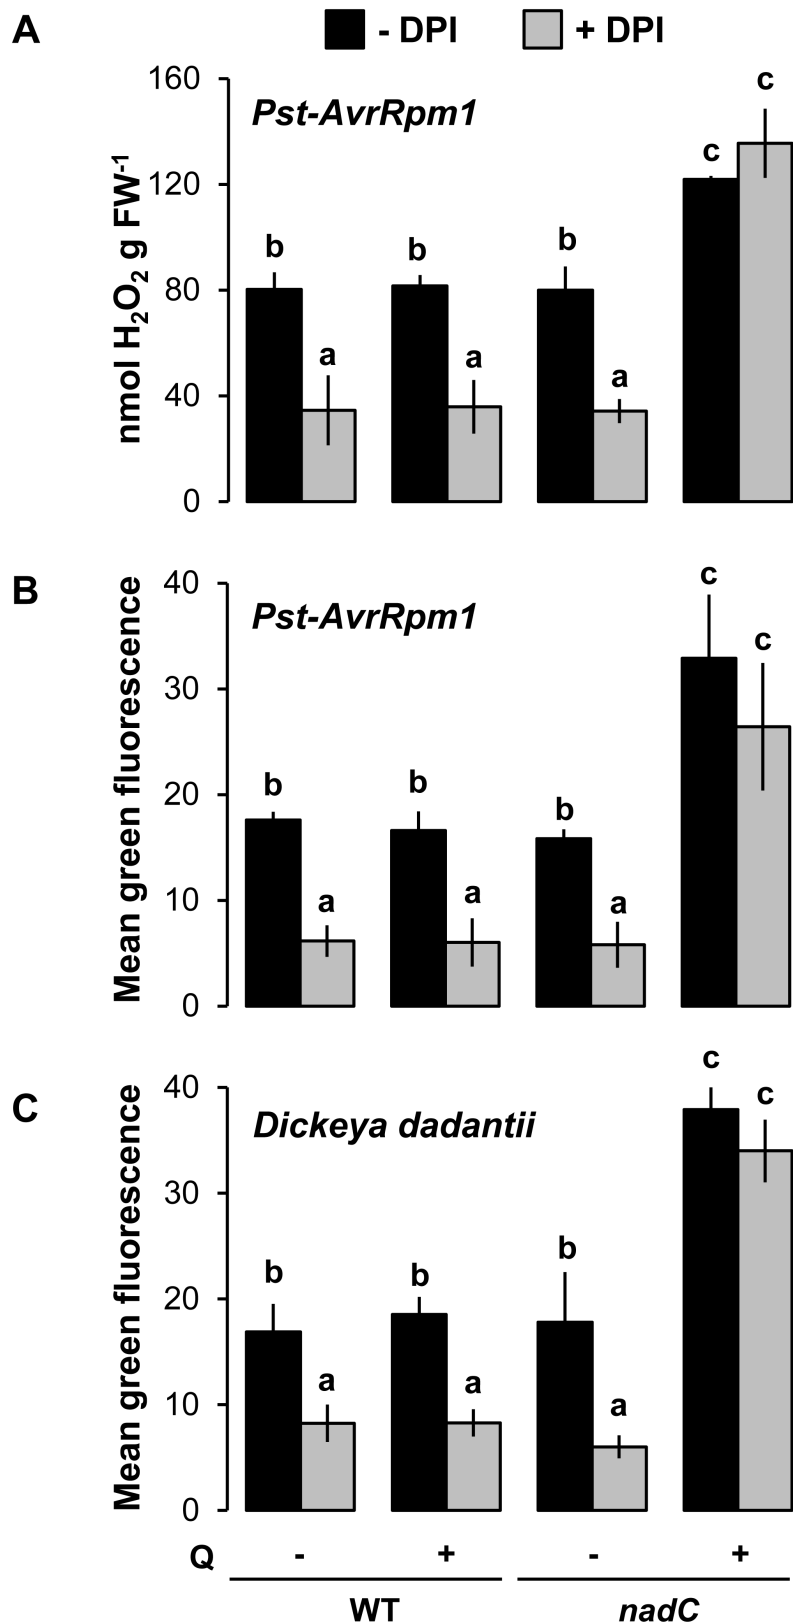

**Supplemental Fig. S4. The NAD-induced oxidative burst is insensitive to NADPH oxidase inhibitor** WT (Col-0) and *nadC* illuminated leaves were infiltrated with (+) or without (-) 5 mM quinolinate (Q) to increase NAD contents (max 48 hours post treatment) and 47 hours later the same leaves were infiltrated with 25  $\mu$ M DPI. An hour after DPI treatment, leaves were infected with *Pst-AvrRpm1* (A, B) or *Dickeya dadantii* (C), and ROS were quantified at 20 hpi by luminol chemiluminescence (A;  $n = 4$ ,  $\pm$  SEM) and DCFH-DA fluorescence (B and C;  $n = 12$ ,  $\pm$  SEM). For both pathogens, mock conditions were monitored in parallel (data not shown). Letters indicate statistically significant differences ( $P < 0.05$ ,  $t$ -test).
