# Supplementary material
Source: PubMed Central journal article supplement (PMC5100754)
Supplement: supp_pp.16.00780_PP2016-00780DR1_Supplemental_Figure_S6.pdf [file supp_pp.16.00780_PP2016-00780DR1_Supplemental_Figure_S6.pdf]

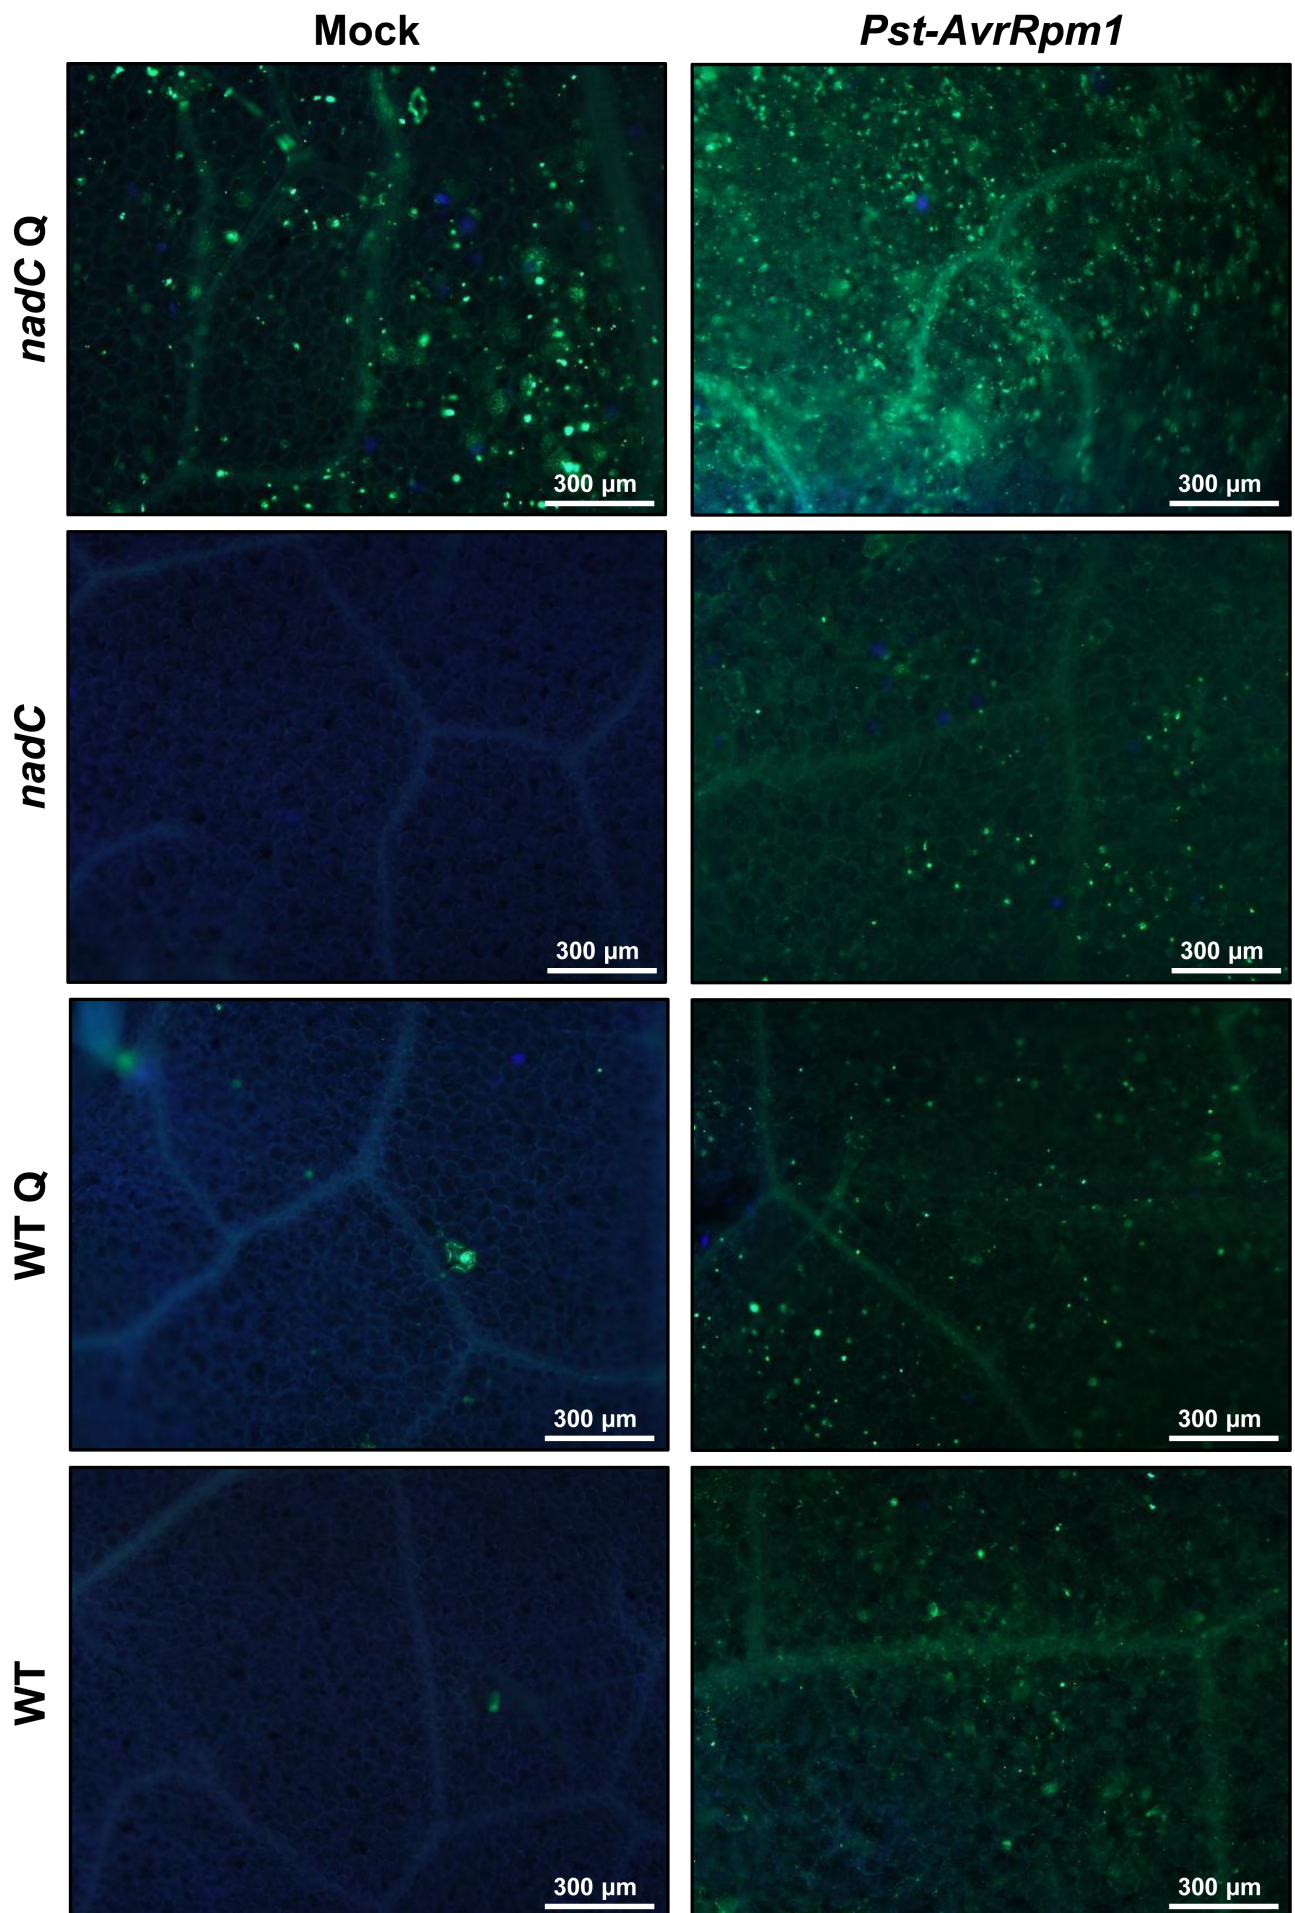

**Supplemental Fig. S6. Stimulation of callose deposition at higher NAD pools** Typical pictures used for the quantification of callose deposition by epifluorescence microscopy as in Fig. 5 ( $n = 12$ ). White bars indicate scales (300  $\mu\text{m}$ ).
