# Supplementary material
Source: PubMed Central journal article supplement (PMC5100754)
Supplement: supp_pp.16.00780_PP2016-00780DR1_Supplemental_Figure_S7.pdf [file supp_pp.16.00780_PP2016-00780DR1_Supplemental_Figure_S7.pdf]

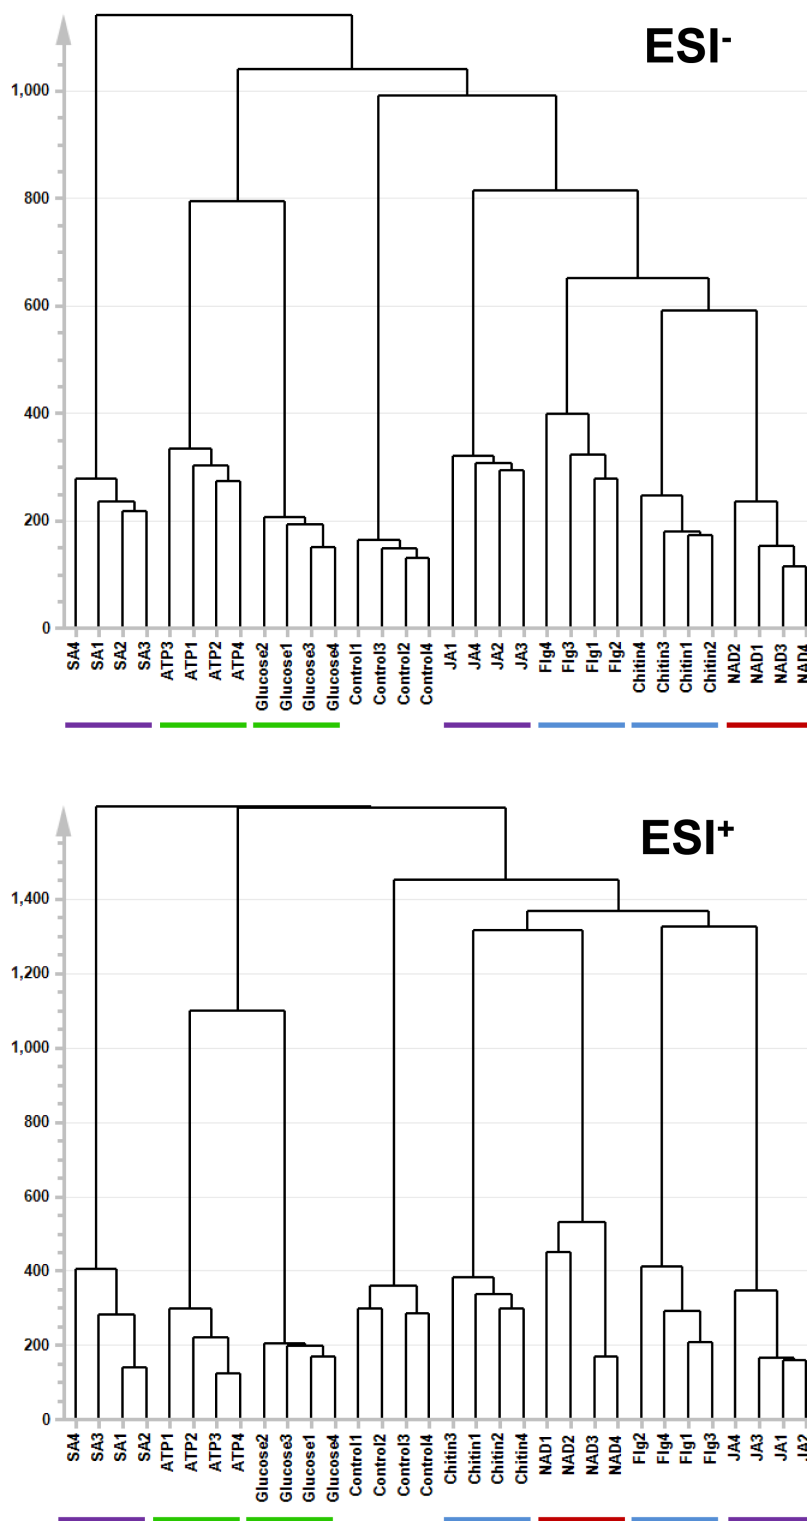

**Supplemental Fig. S7. Hierarchical clustering analysis (HCA) of metabolic markers detected by UPLC-qTOF-MS<sup>E</sup>** Dendrograms were realized in SIMCA (v 13.0.3). Distances (y axis) were calculated by Single linkage and trees sorted by size. The treatments ( $n = 4$ ) correspond to those described in Fig. 6. Colored bars indicate the type of defense-eliciting conditions (red, NAD<sup>+</sup>; blue, PAMPs; green, DAMPs; purple, hormones). ATP: adenosine triphosphate; ESI: electrospray ionization; Flg: flagellin; JA: jasmonic acid; NAD: nicotinamide adenine dinucleotide; SA; salicylic acid.
