# Supplementary material
Source: PubMed Central journal article supplement (PMC5100754)
Supplement: supp_pp.16.00780_PP2016-00780DR1_Supplemental_Figure_S11.pdf [file supp_pp.16.00780_PP2016-00780DR1_Supplemental_Figure_S11.pdf]

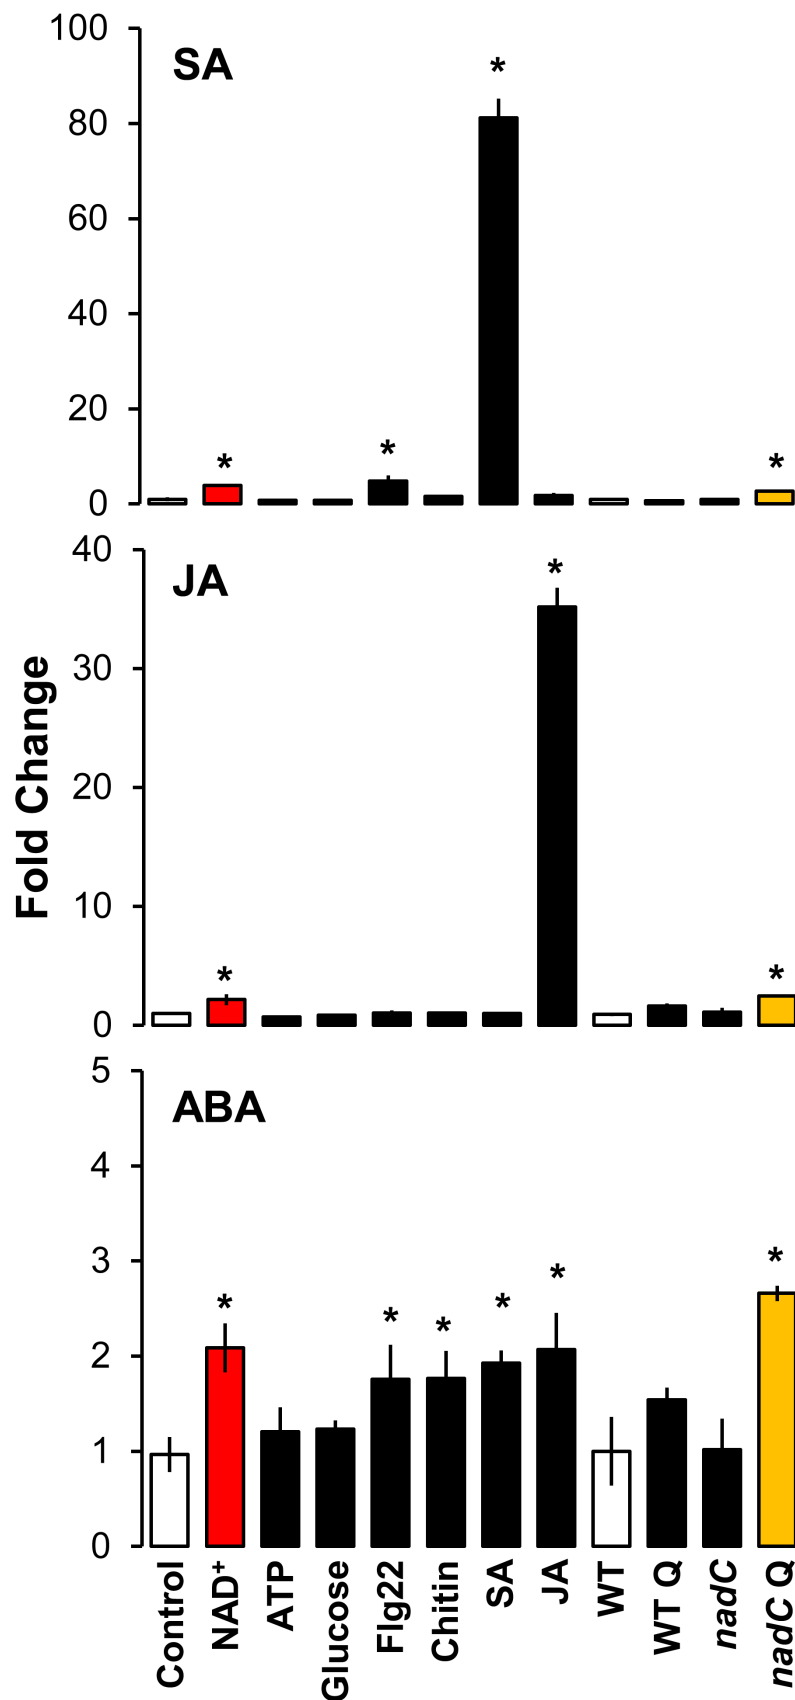

**Supplemental Fig. S11. NAD-induced hormonal perturbations** Relative quantification of the defense hormones SA, JA and ABA in Arabidopsis leaves ( $n = 4$ ) as described in Table 1. The treatments correspond to those described in Fig. 6 and Fig. S8. Asterisks denote statistically significant difference between treatment and the corresponding control ( $P < 0.05$ ,  $t$ -test).
