# Supplementary material
Source: PubMed Central journal article supplement (PMC5100754)
Supplement: supp_pp.16.00780_PP2016-00780DR1_Supplemental_Figure_S12.pdf [file supp_pp.16.00780_PP2016-00780DR1_Supplemental_Figure_S12.pdf]

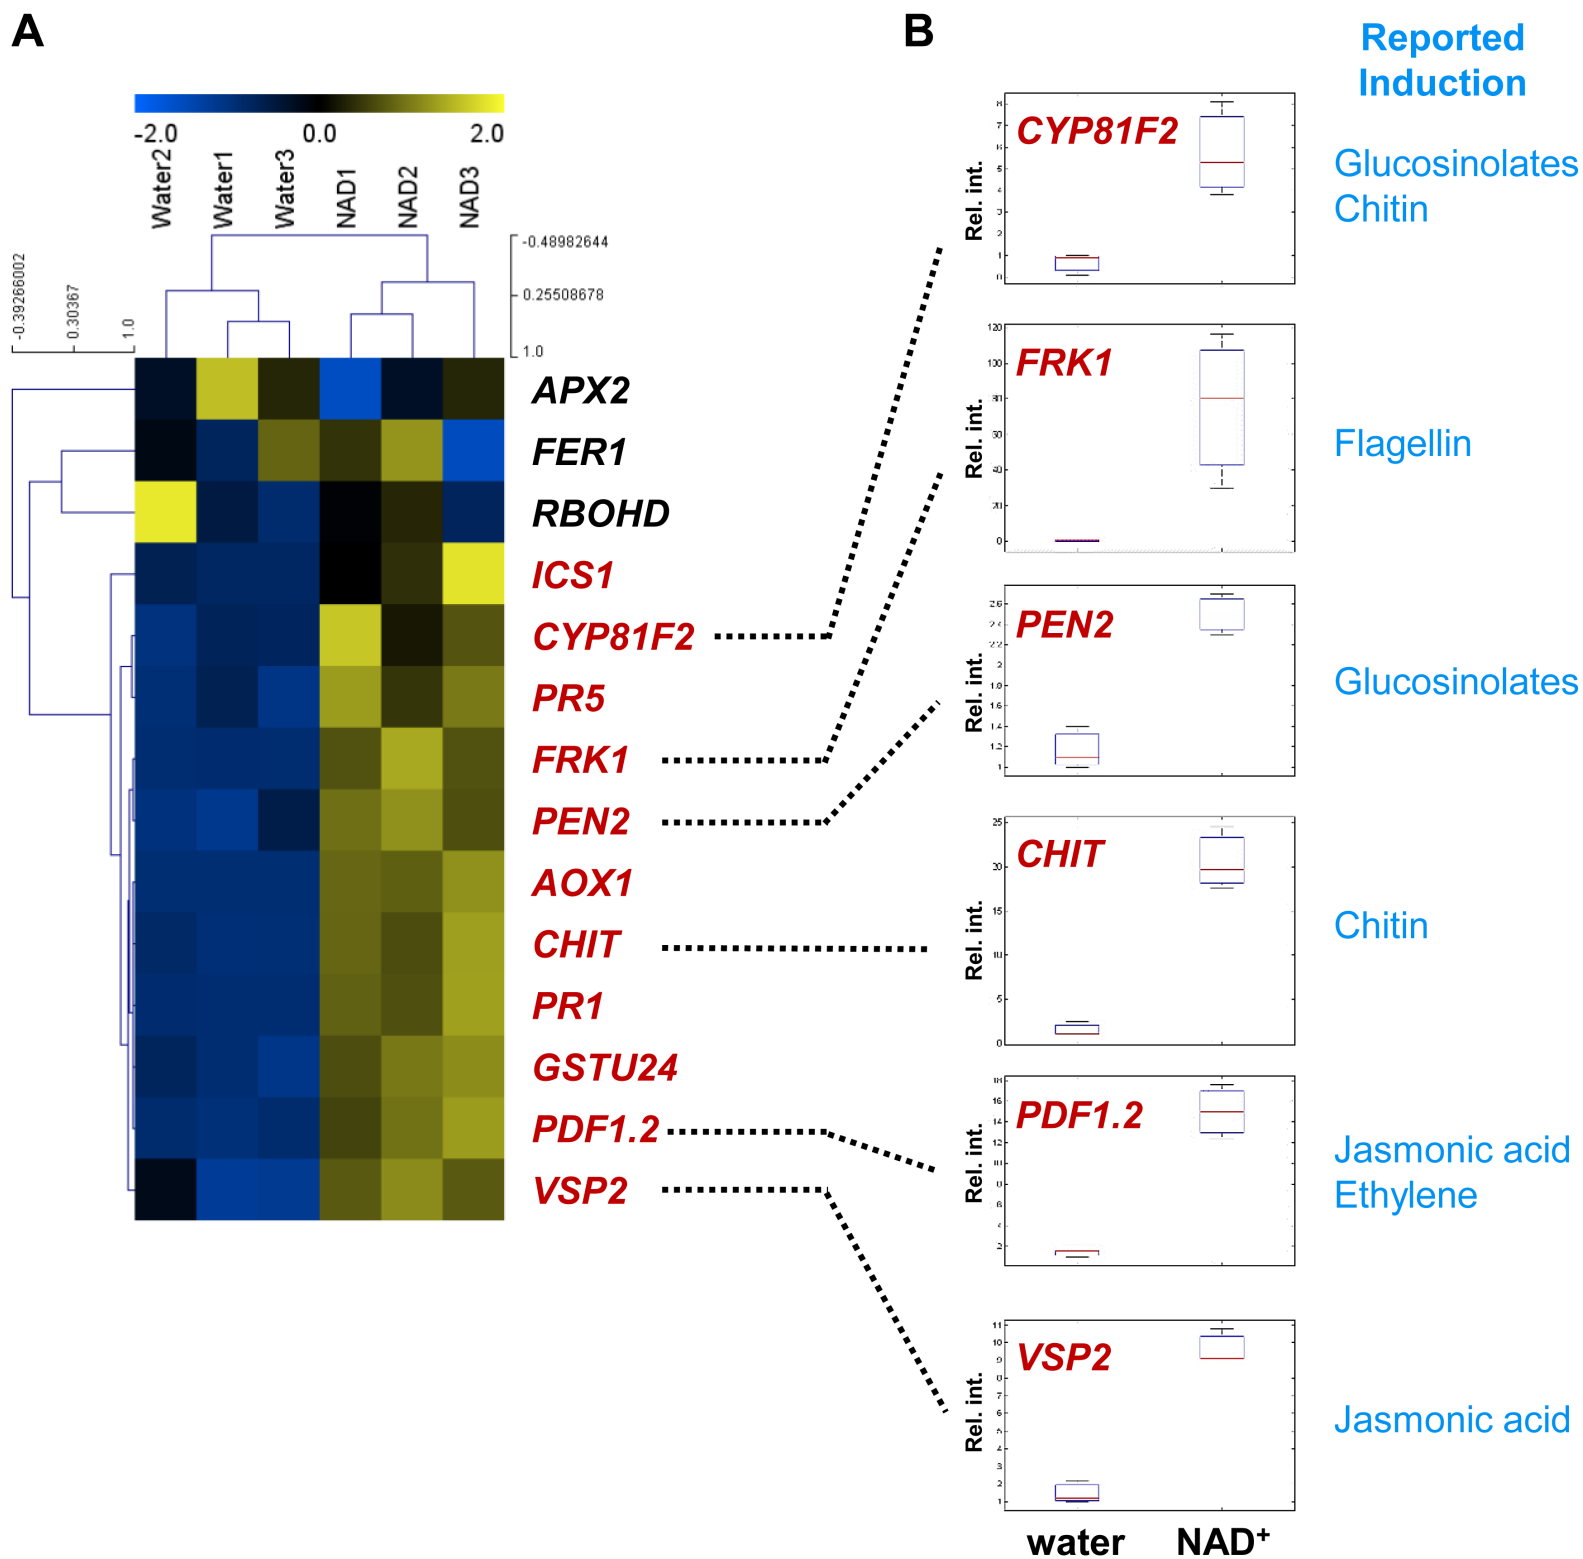

**Supplemental Fig. S12. Expression of marker genes involved in redox and defense signaling after NAD<sup>+</sup> treatment** **A**, hierarchical clustering (HCA) of gene expression relative to *ACT2* in illuminated Col-0 leaves infiltrated with water or 1 mM NAD<sup>+</sup> (24 hours post-treatment,  $n = 3$ ). Colors show normalized intensities of gene expression (blue = low, yellow = high). Genes that show statistically significant differences between water and NAD<sup>+</sup> treatment are indicated in red ( $t$ -test,  $P < 0.05$ ). HCA was realised using MeV (v 4.9, Pearson correlation, average linkage method). **B**, boxplots of selected genes from the HCA presented in **A**. Boxplots were realized using MarVis (v 1.9.4). Reported inductions of gene expressions are shown in blue on the right side.
