# Supplementary material
Source: PubMed Central journal article supplement (PMC5100754)
Supplement: supp_pp.16.00780_PP2016-00780DR1_Supplemental_Figure_S13.pdf [file supp_pp.16.00780_PP2016-00780DR1_Supplemental_Figure_S13.pdf]

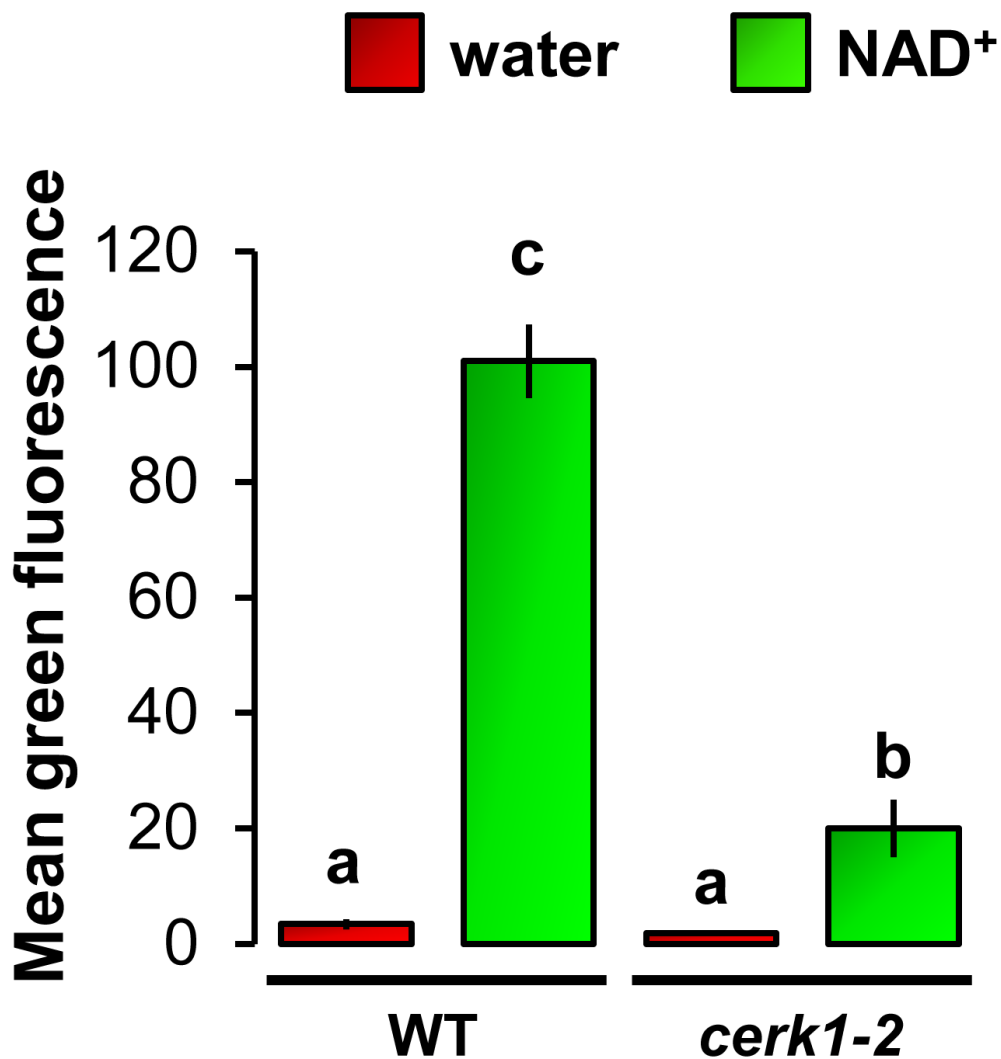

**Supplemental Fig. S13. NAD-associated ROS production is reduced in the chitin-responsive mutant *cerk1-2*** Illuminated leaves of wild-type Col-0 and mutant plants impaired in chitin-signaling (*cerk1-2*) were infiltrated with water (red bars) or 1 mM NAD<sup>+</sup> (green bars), and ROS production was assessed by DCFH-DA fluorescence 24 hours post-treatment. Charts are mean of 12 biological replicates  $\pm$  SEM. Letters denote statistically significant differences ( $P < 0.05$ , *t*-test).
