# Supplementary material
Source: PubMed Central journal article supplement (PMC5100754)
Supplement: supp_pp.16.00780_PP2016-00780DR1_Supplemental_Table_S1.pdf [file supp_pp.16.00780_PP2016-00780DR1_Supplemental_Table_S1.pdf]

### Supplemental Table S1. Validation parameters of the OPLS-DA models

OPLS-DA models for the elicitors treatments (A) and the *nadC* experiment (B) were validated by multivariate statistics using SIMCA (v 13.0.3). Values of  $R^2$  and  $Q^2$  indicate correlation and predictability parameters, respectively, where X represents the variables, and Y the classes. Models were also confirmed by cross-validation ANOVA, with the *P* value given in blue. In all cases, validation parameters were highly satisfactory. ESI<sup>-</sup> and ESI<sup>+</sup>: negative and positive electrospray ionization, respectively.

|                                                   | Elicitors (A)    |                  | <i>nadC</i> (B)  |                  |
|---------------------------------------------------|------------------|------------------|------------------|------------------|
|                                                   | ESI <sup>-</sup> | ESI <sup>+</sup> | ESI <sup>-</sup> | ESI <sup>+</sup> |
| <b>Detected metabolic markers</b>                 | 5112             | 10273            | 5107             | 10207            |
| <b>Goodness of prediction, <math>R^2</math> X</b> | 0.78             | 0.69             | 0.85             | 0.86             |
| <b>Goodness of prediction, <math>R^2</math> Y</b> | 0.93             | 0.97             | 0.99             | 1.00             |
| <b>Goodness to fit, <math>Q^2</math> X</b>        | 0.64             | 0.72             | 0.85             | 0.89             |
| <b>Cross-validation ANOVA <i>P</i> value</b>      | 2E-04            | 1E-06            | 1E-03            | 3E-04            |
